# Supplementary material for: Freestanding MXene-hydrogels prepared via critical density-controlled self-assembly: high-performance energy storage with ultrahigh capacitive vs. diffusion-limited contribution
Source: Royal Society of Chemistry journal article supplement (doi:10.1039/d1ta07172f), 2021-01-01
Supplement: d1ta07172f2.pdf [file d1ta07172f2.pdf]

## Supporting Information

Freestanding MXene-hydrogel *via* critical density  
controlled self-assembly: high performance energy  
storage with ultrahigh capacitive vs diffusion  
limited contribution

*Pronoy Dutta, Amalika Patra, Sujit Kumar Deb, Anirban Sikdar, Abhisek Majumdar, Golam  
Masud Karim, Uday Narayan Maiti \**

Department of Physics, Indian Institute of Technology Guwahati, Guwahati-781039, Assam,  
India

Corresponding address:

udaymaiti@iitg.ac.in (UNM)

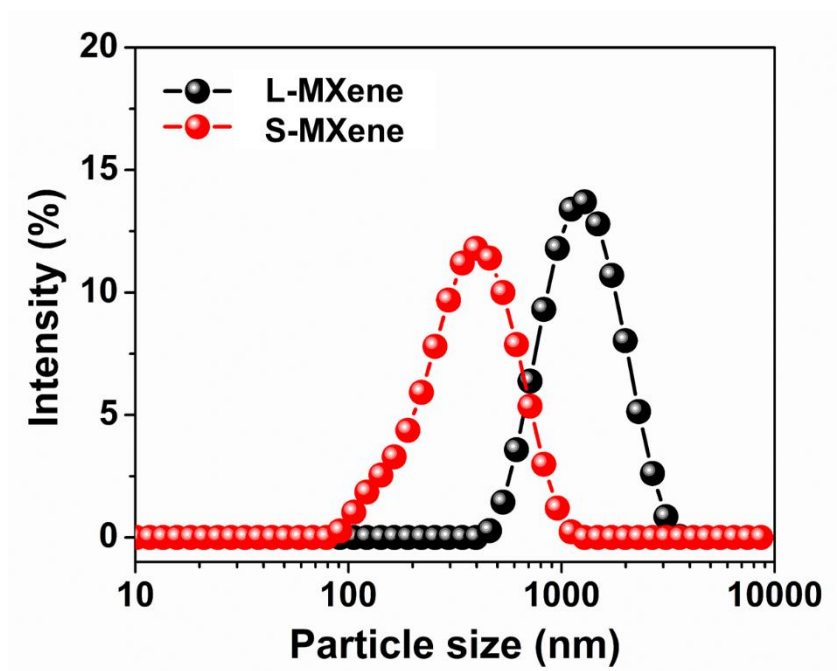

Fig. S1: DLS measurement of large and small MXene dispersion indicating the sheet size distribution

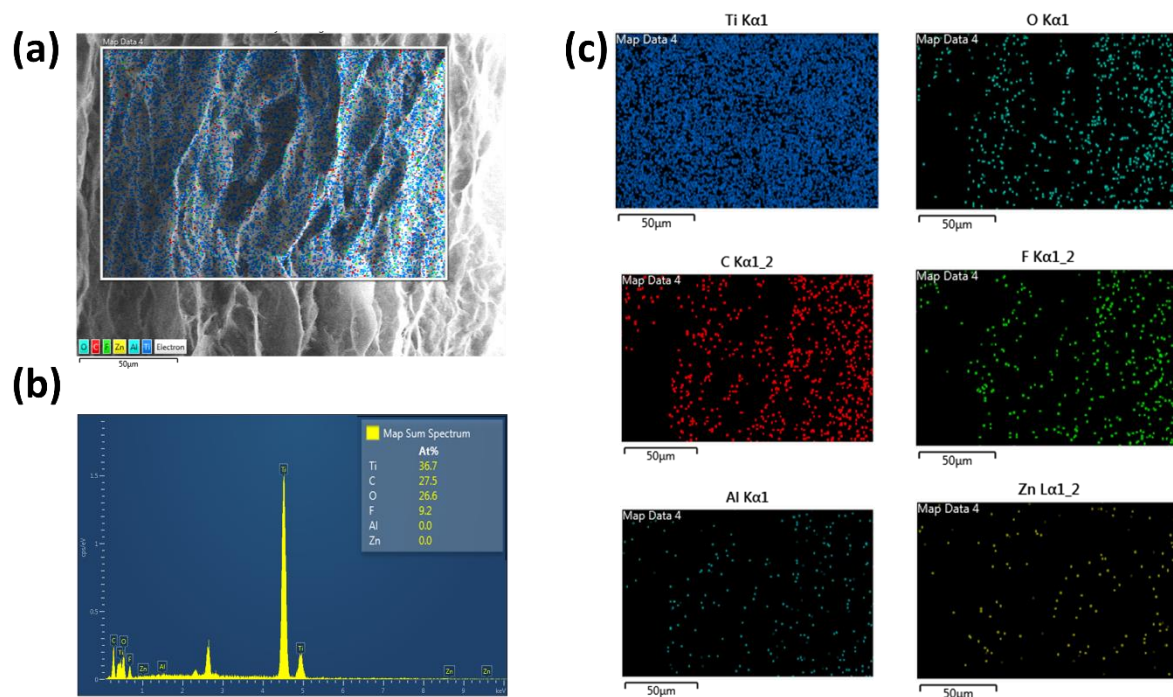

Fig. S2: Cross sectional FESEM EDS spectra of freeze-dried MXene hydrogel: (a) Mapping of different elements over the hydrogel cross section; (b) corresponding at% and (c) mapping of individual elements over the structure.

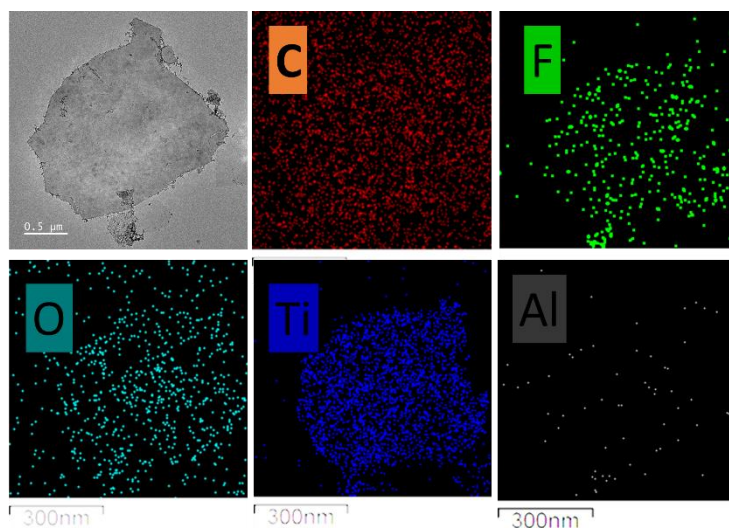

Fig. S3: FETEM image of MXene flake with corresponding EDS spectra confirming subsequent etching of Al and functionalization in the MILD etching process.

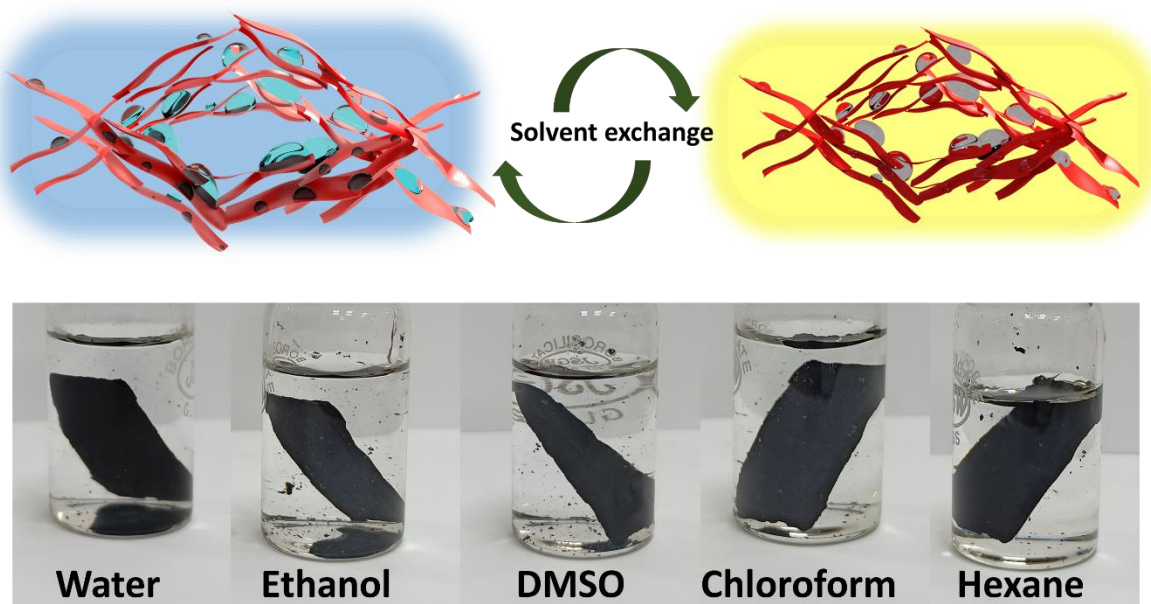

Fig. S4: Facile solvent exchange in MXene hydrogels for the development of possible solvated MXene framework (SMF).

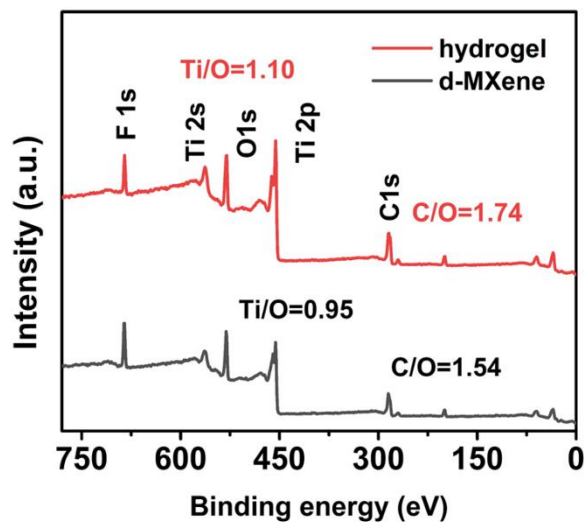

Fig. S5: XPS survey scan for d-MXene and MXene hydrogel.

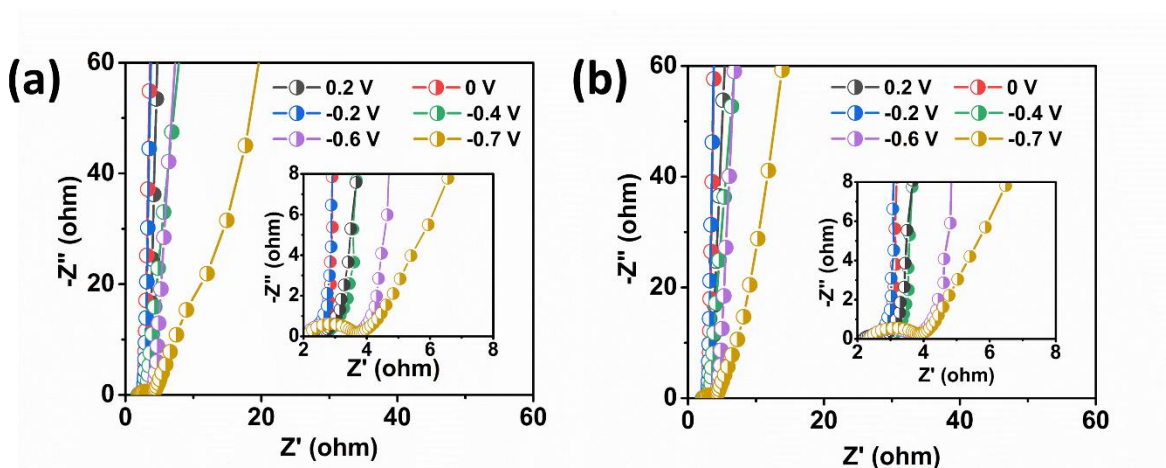

Fig. S6: EIS spectra of hydrogels at different applied potentials for (a) LMH\_3.1, (b) SMH\_3.4 electrodes.

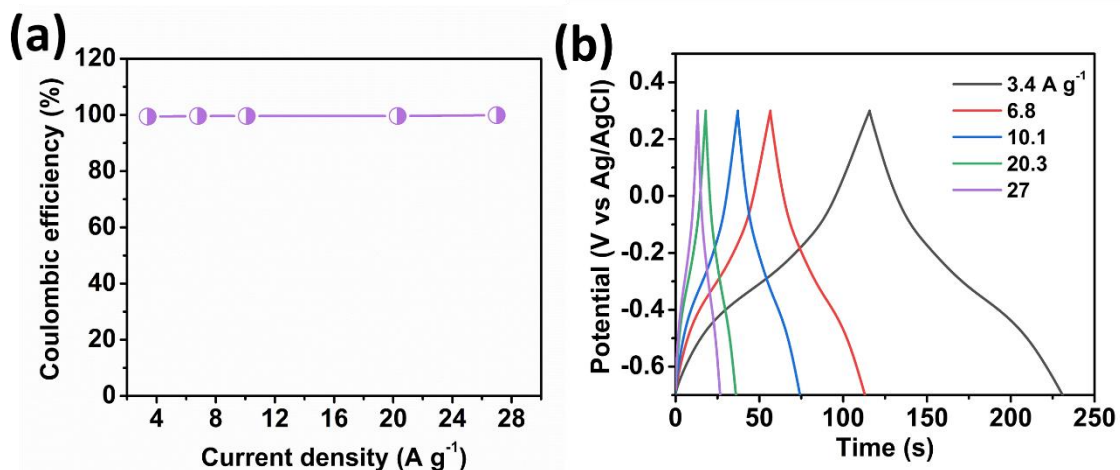

Fig. S7: (a) Coulombic efficiency and (b) GCD curves at different current densities for LMH\_3.1 electrode.

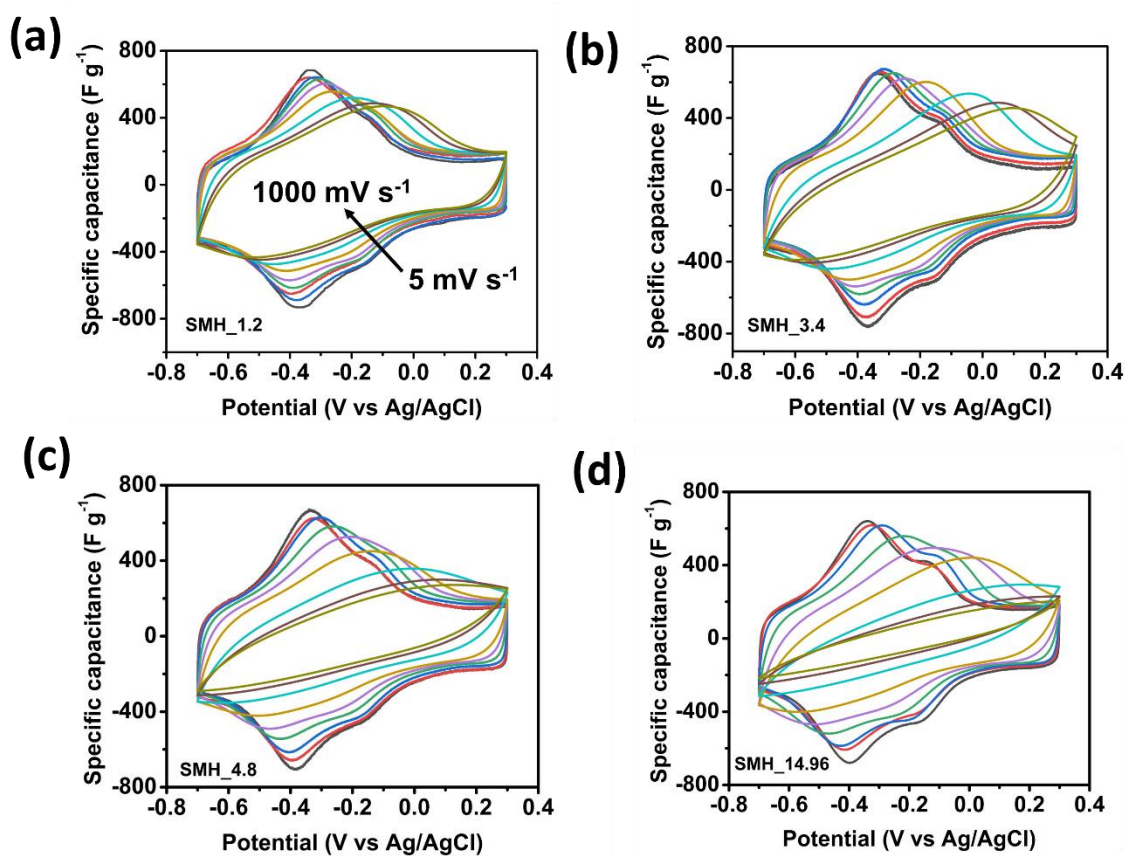

Fig. S8: CV curves of SMH electrodes of different mass loading at scan rates from 5  $\text{mV s}^{-1}$  to 1000  $\text{mV s}^{-1}$

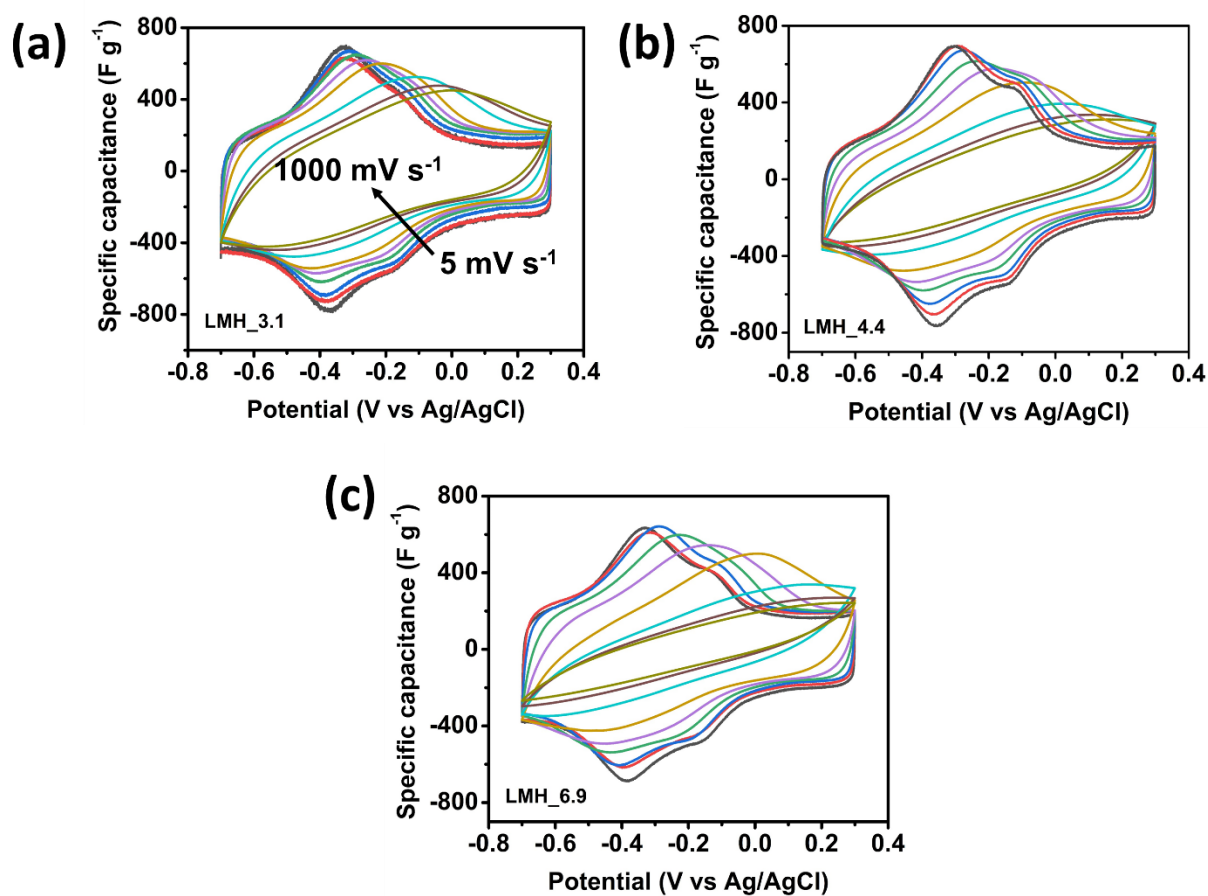

Fig. S9: CV curves of LMH electrodes of different mass loading at scan rates from 5  $mV s^{-1}$  to 1000  $mV s^{-1}$

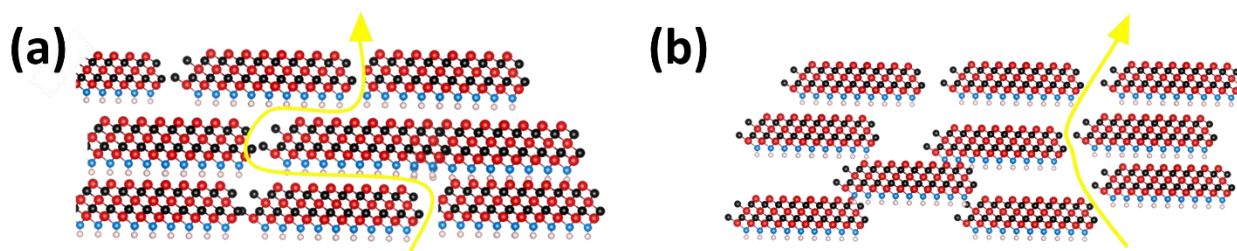

Fig. S10: Illustration for difference in ion transportation in large and small sheet hydrogels. (a) hydrogels with large sheet size increases the diffusion path whereas regular ion transport channels ease the transportability in (b) small sheet hydrogels

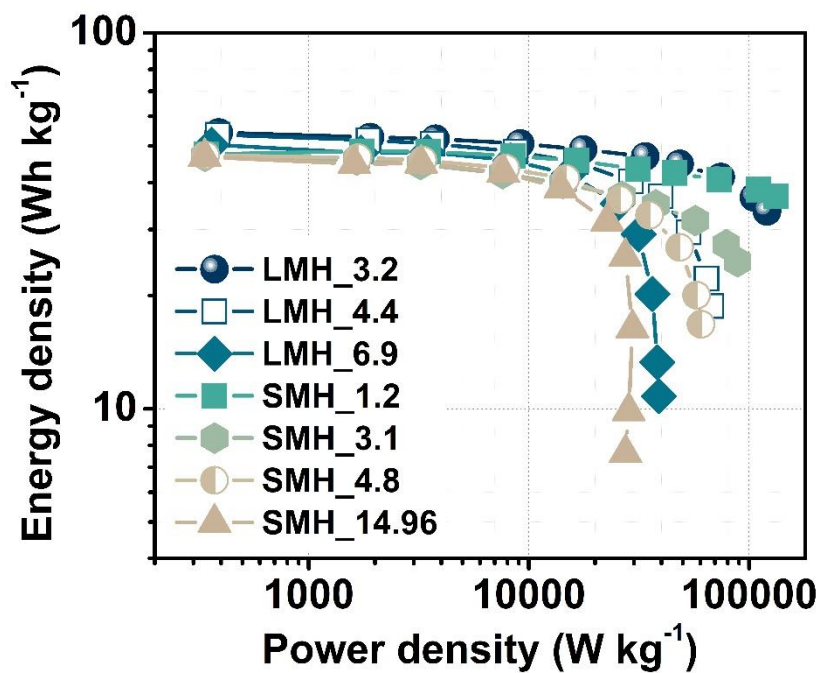

Fig. S11: Ragone plot showing gravimetric energy and power densities of freestanding hydrogel electrodes.



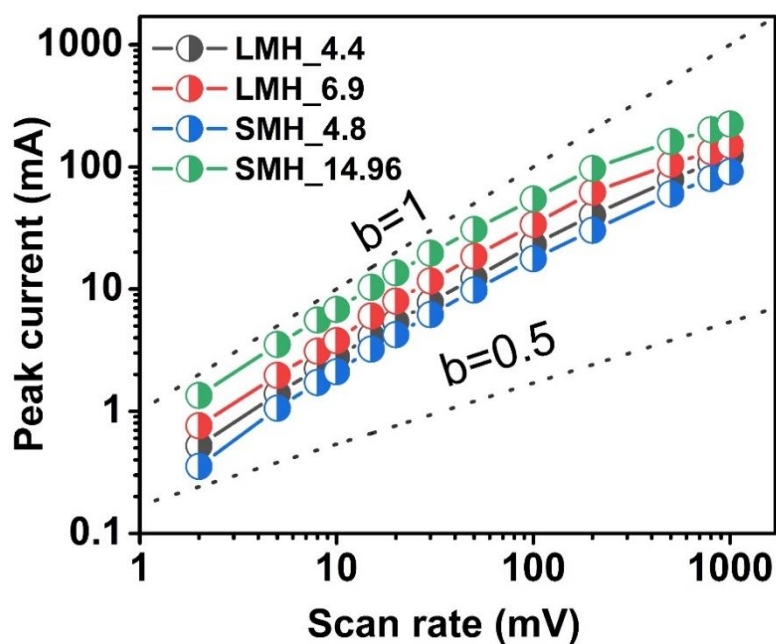

Fig. S12:  $b$  values of MXene hydrogels determined from power law.

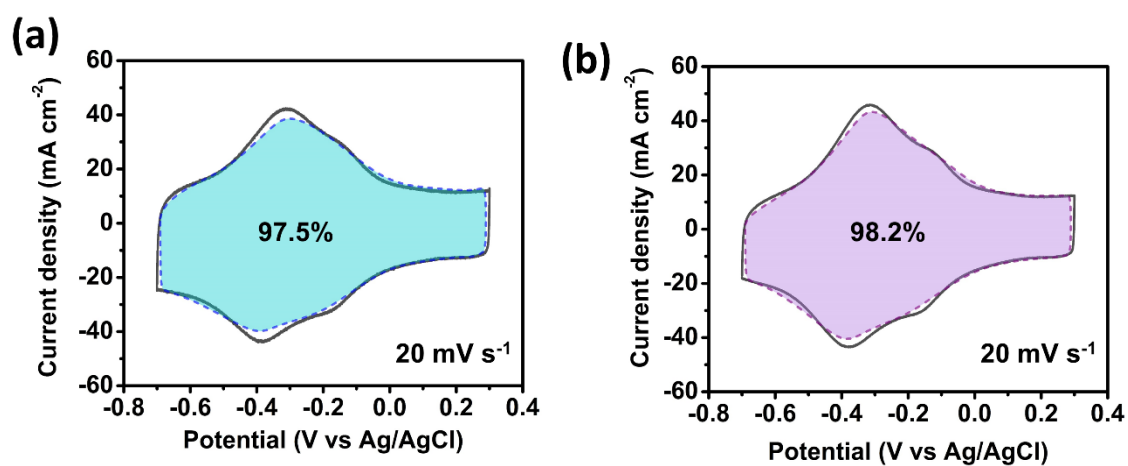

Fig. S13: Analysis for capacitive contribution in charge storage for MXene hydrogels at 20 mV s<sup>-1</sup>: (a) For LMH\_3.1 and (b) SMH\_3.4 hydrogel electrode.

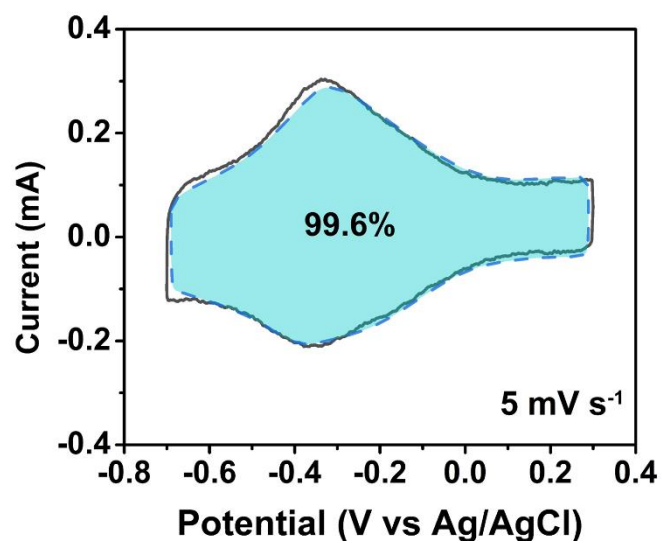

Fig. S14: Analysis of capacitive contribution in compressed SCM3.6 electrode at 5 mV s<sup>-1</sup>.

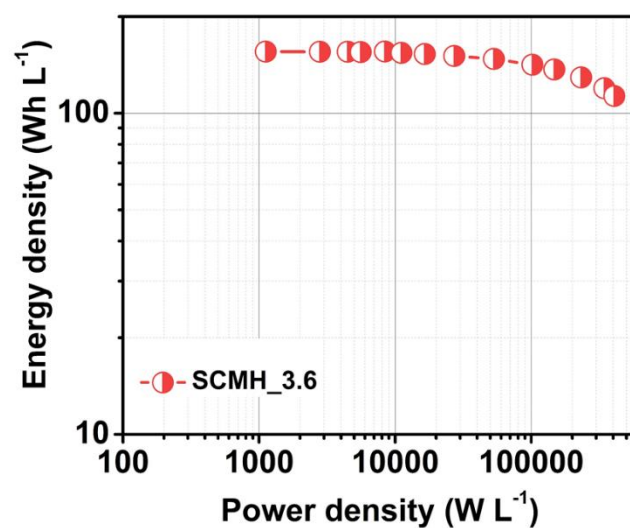

Fig. S15: Ragone plot for volumetric energy and power densities for the electrolyte assisted compressed SCM3.6 electrode.

Table S1: List of MXene hydrogel samples and their energy storage matrices calculated from CV curves at 2 mV s<sup>-1</sup>.

| <b>Sample name</b> | <b>Mass loading (mg cm<sup>-2</sup>)</b> | <b>Gravimetric capacitance (F g<sup>-1</sup>)</b> | <b>Areal capacitance (mF cm<sup>-2</sup>)</b> |
|--------------------|------------------------------------------|---------------------------------------------------|-----------------------------------------------|
| <b>LMH_3.1</b>     | 3.1                                      | 391.01                                            | 1212.1                                        |
| <b>LMH_4.4</b>     | 4.4                                      | 386.33                                            | 1699.85                                       |
| <b>LMH_6.9</b>     | 6.9                                      | 363.05                                            | 2505.07                                       |
| <b>SMH_1.2</b>     | 1.2                                      | 342.57                                            | 411.09                                        |
| <b>SMH_3.4</b>     | 3.4                                      | 344.76                                            | 1168.73                                       |
| <b>SMH_4.8</b>     | 4.8                                      | 340.65                                            | 1635.12                                       |
| <b>SMH_14.96</b>   | 14.96                                    | 337.08                                            | 5042.81                                       |

Table S2: Electrochemical performance comparison of freestanding MXene hydrogels with previously reported MXene based electrodes.

| Sample type                                                         | Gravimetric capacitance (F/g)                   | Mass loading            | Rate performance               | Electrolyte                        | Reference |
|---------------------------------------------------------------------|-------------------------------------------------|-------------------------|--------------------------------|------------------------------------|-----------|
| <b>Ti<sub>3</sub>C<sub>2</sub>T<sub>x</sub> clay</b>                | 245 Fg <sup>-1</sup> at 2 mV s <sup>-1</sup>    | -                       | 80% @ 100 mV s <sup>-1</sup>   | 1 M H <sub>2</sub> SO <sub>4</sub> | 1         |
| <b>Ti<sub>3</sub>C<sub>2</sub>T<sub>x</sub> film</b>                | 195 Fg <sup>-1</sup> at 2 mV s <sup>-1</sup>    | 0.75mg cm <sup>-2</sup> | 61% @ 1 V s <sup>-1</sup>      | LiTFSI-PC                          | 2         |
| <b>d-Ti<sub>3</sub>C<sub>2</sub> film</b>                           | 325 Fg <sup>-1</sup> at 2 mV s <sup>-1</sup>    | 1.3 mg cm <sup>-2</sup> | 42.3% @ 100 mV s <sup>-1</sup> | 1M H <sub>2</sub> SO <sub>4</sub>  | 3         |
| <b>Rolled MXene aerogel</b>                                         | 315 Fg <sup>-1</sup> at 10 mV s <sup>-1</sup>   | 0.6 mg cm <sup>-2</sup> | 39% at 200 mV s <sup>-1</sup>  | 3M H <sub>2</sub> SO <sub>4</sub>  | 4         |
| <b>Alkali treated Ti<sub>3</sub>C<sub>2</sub>T<sub>x</sub></b>      | 314 Fg <sup>-1</sup> at 2 mV s <sup>-1</sup>    | 8.5 mg cm <sup>-2</sup> | -                              | 1M H <sub>2</sub> SO <sub>4</sub>  | 5         |
| <b>Cation intercalated Ti<sub>3</sub>C<sub>2</sub>T<sub>x</sub></b> | 130 Fg <sup>-1</sup> at 2 mV s <sup>-1</sup>    | -                       | 61.5% at 100                   | 1M KOH                             | 6         |
| <b>Ti<sub>3</sub>C<sub>2</sub>T<sub>x</sub>-rGO film</b>            | 391 Fg <sup>-1</sup> at 2 mV s <sup>-1</sup>    | -                       | 49 % at 1 V s <sup>-1</sup>    | 3M H <sub>2</sub> SO <sub>4</sub>  | 7         |
| <b>rGO/Ti<sub>3</sub>C<sub>2</sub>T<sub>x</sub> film</b>            | 335.4 Fg <sup>-1</sup> at 2 mV s <sup>-1</sup>  | -                       | 61% @ 1 V s <sup>-1</sup>      | 3M H <sub>2</sub> SO <sub>4</sub>  | 8         |
| <b>Ti<sub>3</sub>C<sub>2</sub>T<sub>x</sub>-SWCNT</b>               | 134 Fg <sup>-1</sup> at 2 mV s <sup>-1</sup>    | 0.73                    | 71.8 at 200                    | 1M MgSO <sub>4</sub>               | 9         |
| <b>d-Mo<sub>2</sub>CT<sub>x</sub> film</b>                          | 196 Fg <sup>-1</sup> @ 2 mV s <sup>-1</sup>     | 0.6mg cm <sup>-2</sup>  | 61.2 at 100                    | 1M H <sub>2</sub> SO <sub>4</sub>  | 10        |
| <b>Ti<sub>3</sub>C<sub>2</sub>T<sub>x</sub>-PVA</b>                 | 167 Fg <sup>-1</sup> at 2 mV s <sup>-1</sup>    | -                       | 56.8 at 100                    | 1M KOH                             | 11        |
| <b>LMH_3.1</b>                                                      | 391 Fg <sup>-1</sup> at 2 mV s <sup>-1</sup>    | 3.1                     | 60% at 1 V s <sup>-1</sup>     | 3M H <sub>2</sub> SO <sub>4</sub>  | This work |
| <b>SMH_1.2</b>                                                      | 342.6 Fg <sup>-1</sup> at 2 mV s <sup>-1</sup>  | 1.2                     | 76% at 1 V s <sup>-1</sup>     | 3M H <sub>2</sub> SO <sub>4</sub>  | This work |
| <b>SMH_14.96</b>                                                    | 337.08 Fg <sup>-1</sup> at 2 mV s <sup>-1</sup> | 14.96                   | 82% at 100 mV s <sup>-1</sup>  | 3M H <sub>2</sub> SO <sub>4</sub>  | This work |

Tables S3: ESR values of MXene hydrogels:

| Sample name | ESR ( $\Omega$ ) |
|-------------|------------------|
| LMH_3.1     | 1.64             |
| LMH_6.9     | 2.58             |
| SMH_1.2     | 1.39             |
| SMH_3.4     | 1.38             |
| SMH_14.96   | 1.45             |

Table S4: Comparison of surface capacitive contribution in MXene based electrodes:

| Sample                                                                 | Surface capacitive contribution | Reference |
|------------------------------------------------------------------------|---------------------------------|-----------|
| Ti <sub>3</sub> C <sub>2</sub> T <sub>x</sub> aerogel                  | 60.1% at 2 mV s <sup>-1</sup>   | 12        |
| Pristine Ti <sub>3</sub> C <sub>2</sub> T <sub>x</sub>                 | 87.2% at 10 mV s <sup>-1</sup>  | 13        |
| N doped Ti <sub>3</sub> C <sub>2</sub> T <sub>x</sub> film             | 65.5% at 10 mV s <sup>-1</sup>  | 13        |
| MXene/PANI film electrodes                                             | 82% at 2 mV s <sup>-1</sup>     | 14        |
| Large sheet Ti <sub>3</sub> C <sub>2</sub> T <sub>x</sub> films        | 66.5% at 5 mV s <sup>-1</sup>   | 15        |
| Small sheet etched Ti <sub>3</sub> C <sub>2</sub> T <sub>x</sub> films | 90.5% at 5 mV s <sup>-1</sup>   | 15        |
| LMH_3.3                                                                | 94.3% at 5 mV s <sup>-1</sup>   | This work |
| SMH_3.1                                                                | 96% at 5 mV s <sup>-1</sup>     | This work |

## References

- 1 M. Ghidui, M. R. Lukatskaya, M.-Q. Zhao, Y. Gogotsi and M. W. Barsoum, *Nature*, , DOI:10.1038/nature13970.
- 2 X. Wang, T. S. Mathis, K. Li, Z. Lin, L. Vlcek, T. Torita, N. C. Osti, C. Hatter, P. Urbankowski, A. Sarycheva, M. Tyagi, E. Mamontov, P. Simon and Y. Gogotsi, *Nat. Energy*, , DOI:10.1038/s41560-019-0339-9.
- 3 Y. Dall’Agnese, M. R. Lukatskaya, K. M. Cook, P. L. Taberna, Y. Gogotsi and P. Simon, *Electrochem. commun.*, 2014, **48**, 118–122.
- 4 V. Bayram, M. Ghidui, J. J. Byun, S. D. Rawson, P. Yang, S. A. McDonald, M. Lindley, S. Fairclough, S. J. Haigh, P. J. Withers, M. W. Barsoum, I. A. Kinloch and S. Barg, *ACS Appl. Energy Mater.*, 2019, **3**, 411–422.
- 5 T. Li, L. Ulu Yao, I. Liu, J. Gu, R. Luo, J. Inghan Li, X. Yan, W. Wang, P. Liu, B. Chen, W. Zhang, W. Abbas, R. Naz and D. Zhang, , DOI:10.1002/ange.201800887.
- 6 M. R. Lukatskaya, O. Mashtalir, C. E. Ren, Y. Dall’Agnese, P. Rozier, P. L. Taberna, M. Naguib, P. Simon, M. W. Barsoum and Y. Gogotsi, *Science (80-. )*, 2013, **341**, 1502–1505.
- 7 G. Wu, O. Li, Z. Wang, M. Li, B. Wang and A. Dong, , DOI:10.1002/anie.202009086.
- 8 J. Yan, C. E. Ren, K. Maleski, C. B. Hatter, B. Anasori, P. Urbankowski, A. Sarycheva and Y. Gogotsi, *Adv. Funct. Mater.*, 2017, **27**, 1701264.
- 9 M.-Q. Zhao, C. E. Ren, Z. Ling, M. R. Lukatskaya, C. Zhang, K. L. Van Aken, M. W. Barsoum and Y. Gogotsi, *Adv. Mater.*, 2015, **27**, 339–345.
- 10 J. Halim, S. Kota, M. R. Lukatskaya, M. Naguib, M.-Q. Zhao, E. Ju Moon, J. Pitock, J. Nanda, S. J. May, Y. Gogotsi, M. W. Barsoum, J. Halim, S. Kota, M. R. Lukatskaya, M. Q. Zhao, E. J. Moon, J. Pitock, S. J. May, Y. Gogotsi, M. W. Barsoum and Y. A. Gogotsi J, , DOI:10.1002/adfm.201505328.
- 11 Z. Ling, C. E. Ren, M.-Q. Zhao, J. Yang, J. M. Giammarco, J. Qiu, M. W. Barsoum and Y. Gogotsi, *Proc. Natl. Acad. Sci.*, 2014, **111**, 16676–16681.
- 12 V. Bayram, M. Ghidui, J. J. Byun, S. D. Rawson, P. Yang, S. A. McDonald, M. Lindley, S. Fairclough, S. J. Haigh, P. J. Withers, M. W. Barsoum, I. A. Kinloch, S.

- Barg and U. K. 9pl, 2021, **10**, 16.
- 13 Y. Tian, W. Que, Y. Luo, C. Yang, X. Yin and L. B. Kong, , DOI:10.1039/c9ta00076c.
- 14 A. Vahidmohammadi, J. Moncada, H. Chen, E. Kayali, J. Orangi, C. A. Carrero and M. Beidaghi, *J. Mater. Chem. A*, 2018, **6**, 22123–22133.
- 15 J. Tang, T. Mathis, X. Zhong, X. Xiao, H. Wang, M. Anayee, F. Pan, B. Xu and Y. Gogotsi, *Adv. Energy Mater.*, 2020, 2003025.
